# Supplementary material for: Direct catalytic conversion of furfural to 1,5-pentanediol by hydrogenolysis of the furan ring under mild conditions over Pt/Co2AlO4 catalyst
Source: Royal Society of Chemistry journal article supplement (doi:10.1039/c0cc05775d), 2011-01-01
Supplement: c0cc05775d.pdf [file c0cc05775d.pdf]

# Direct catalytic conversion of furfural to 1, 5-pentanediol by hydrogenolysis of furan ring at mild conditions over Pt/Co<sub>2</sub>AlO<sub>4</sub> catalyst

Wenjie Xu, Haifeng Wang, Xiaohui Liu, Jiawen Ren, Yanqin Wang\*, Guanzhong Lu\*

## Supplementary Information

### 1. Experimental section

#### Synthesis of Pt/Co<sub>2</sub>AlO<sub>4</sub> and Li-modified Pt/Co<sub>2</sub>AlO<sub>4</sub> catalysts by co-precipitation

Pt/Co-Al-CO<sub>3</sub><sup>2-</sup> hydrotalcite-like (Co-Al-CO<sub>3</sub><sup>2-</sup> HT) precursors were prepared by co-precipitation from an aqueous solution of cobalt and aluminium nitrate (solution A) and a basic solution (solution B). In solution A, a calculated amount of Pt nitrate was added for the co-precipitation.<sup>[6]</sup> The as-prepared precursor was calcined at 300 °C for 4 h with a ramp of 5 °C·min<sup>-1</sup> in air to get the corresponded Pt/Co<sub>2</sub>AlO<sub>4</sub> catalyst. The final Pt loading in the calcined catalyst determined by inductively coupled plasma (ICP-AES) was 1.8 wt.%.

Li-modified catalyst was also prepared by co-precipitation method. The procedure was the same as the synthesis of Pt/Co-Al-CO<sub>3</sub><sup>2-</sup> hydrotalcite-like precursors, but with additional LiCl·H<sub>2</sub>O (Li/(Co+Al)=5wt.%) in Deionized water. The final Li loading in the calcined catalyst determined by EDX was 0.4 wt.%.

#### Characterization of the catalysts

X-ray diffraction pattern (XRD) was recorded with a Rigaku D/max-2550VB/PC diffractometer using Cu K $\alpha$  radiation. Chemical analyses of the samples were performed by using inductively coupled plasma atomic emission spectrometry (ICP-AES). Transmission electron microscopy (TEM) were carried out with TECNAI 20S-TWIN. Nitrogen sorption isotherms were measured at 77 K with a Micromeritics ASAP2020M sorption analyzer. Before the measurements, the samples were outgassed at 280 °C for 6 h. GC-MS was carried out using an Agilent 7890A gas chromatograph connected to a 5975C mass spectrometer with Triple-Axis Detector.

It can be seen from Fig S1, the catalyst is a typical spinel-like phase of composition Co<sub>2</sub>AlO<sub>4</sub>

with diffraction peaks at 18.98, 31.14, 36.76, 44.76, 55.64, 59.26 and 65.24°. There are no reflections corresponding to platinum oxide, indicating that Platinum oxide is highly dispersed in the sample.

### Hydrogenolysis of furfural

The hydrogenolysis reaction was carried out in a stainless autoclave containing 0.4g furfural, 10ml EtOH, and 0.2 g catalyst at the reaction conditions of  $P_{H_2} = 1.0-2.5$  MPa and  $T = 110-140$  °C under magnetic stirring. After reaction for 24 h, the reactor was cooled to room temperature. Then, the catalyst was separated by centrifugation, and the liquid was analyzed by a PerkinElmer Clarus 500 gas chromatography with a SE-54 column and a flame ionization detector (FID). The conversion and selectivity were determined based on the area normalization method. For confirmation, the content of 1,5-pentanediol was also tested by internal standard method (1-octanol as the internal standard). The results calculated by the two methods were consistent. The structural characteristics of products were further identified by GC-MS (Figure S3-S10).

## 2. Figures

### XRD

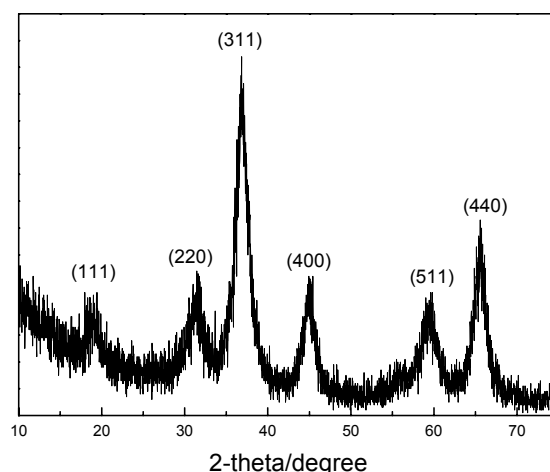

Figure S1 XRD pattern of the Pt/Co<sub>2</sub>AlO<sub>4</sub> catalyst.

### TEM

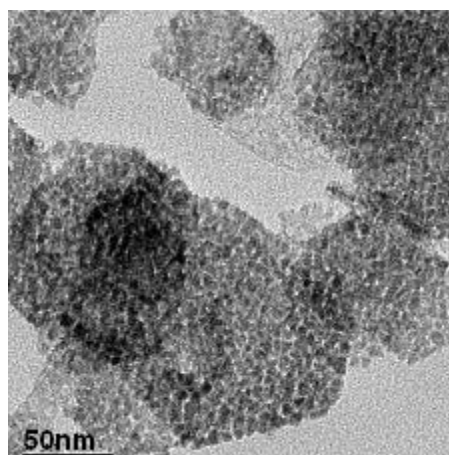

Figure S2 TEM images of Li-modified Pt/Co<sub>2</sub>AlO<sub>4</sub>.

### N<sub>2</sub> sorption

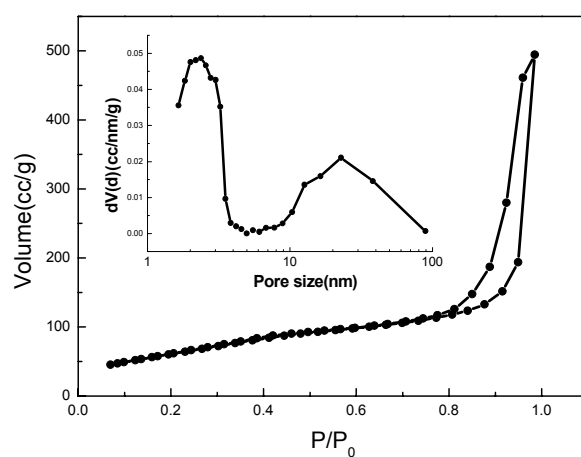

Figure S3 Nitrogen sorption isotherm and pore size distribution of the Pt/Co<sub>2</sub>AlO<sub>4</sub> catalyst.

### GC-MS

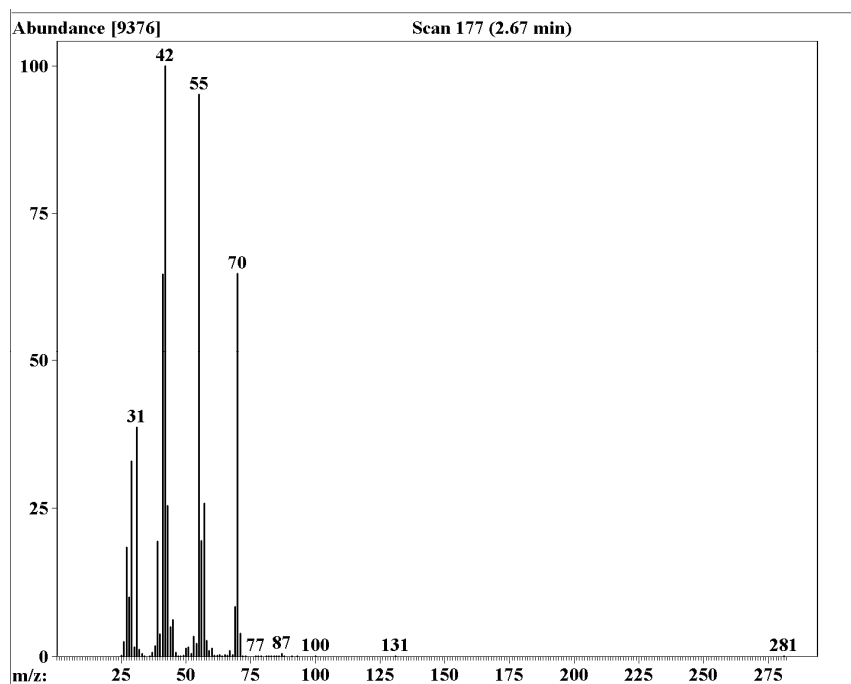

Figure S4. MS spectrum of 1-pentanol.

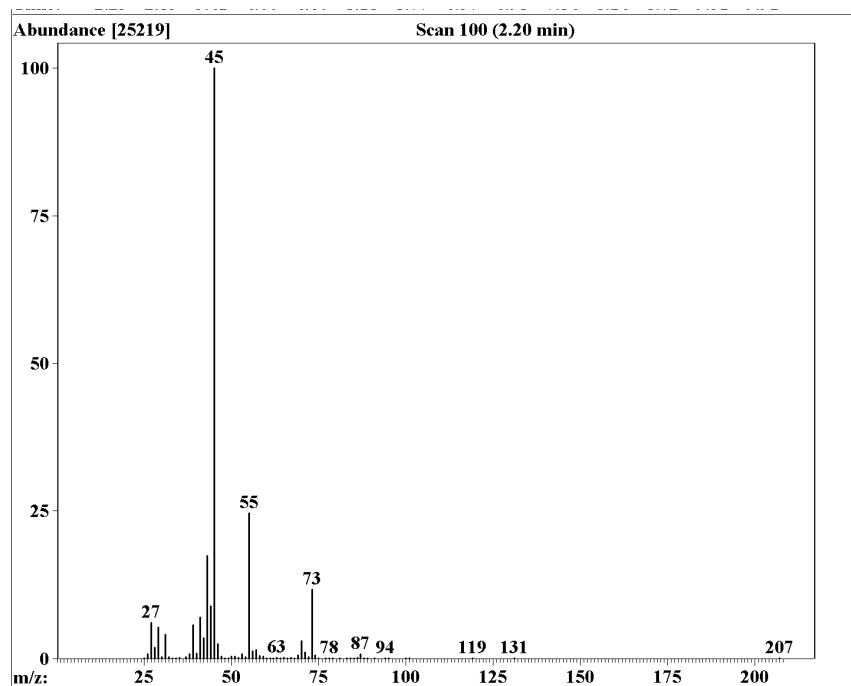

Figure S5. MS spectrum of 2-pentanol.

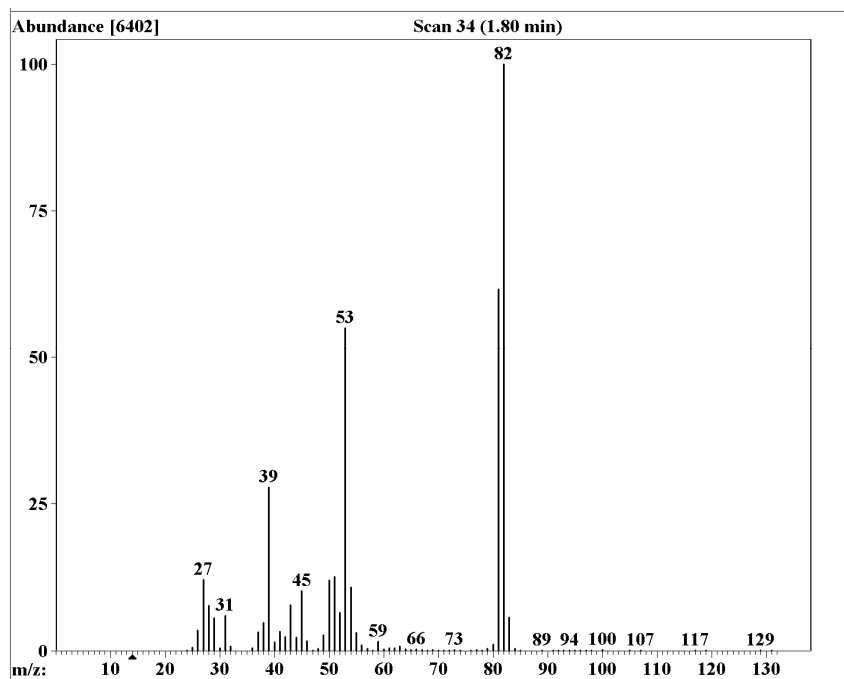

Figure S6. MS spectrum of 2-methylfuran.

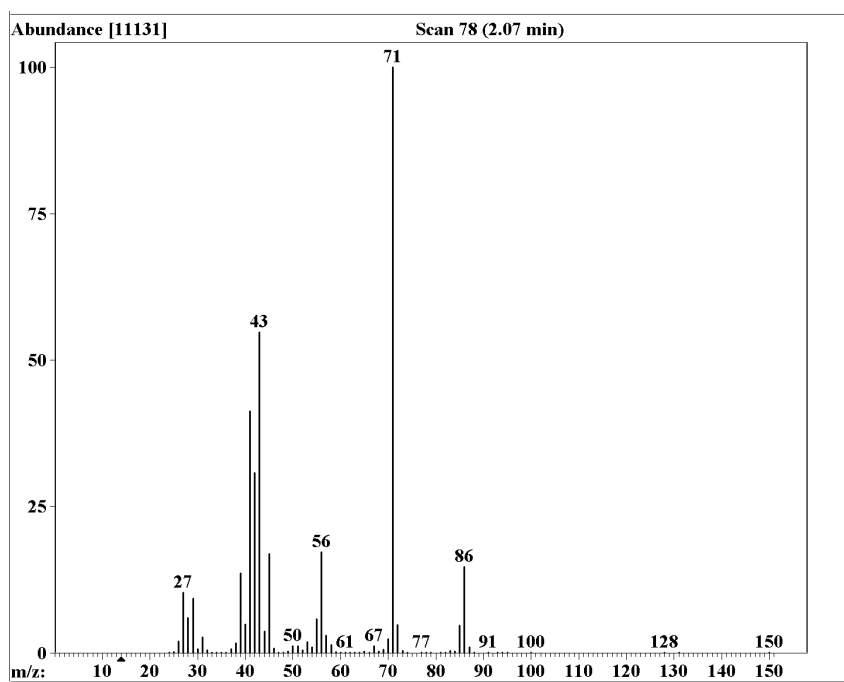

Figure S7. MS spectrum of 2-methyl-tetrahydrofuran.

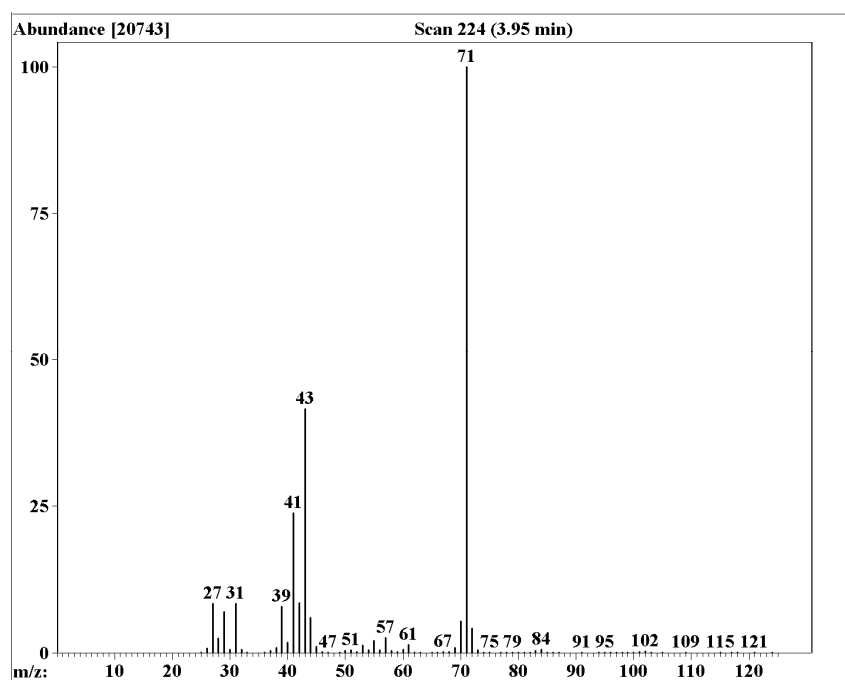

Figure S8. MS spectrum of tetrahydrofurfuryl alcohol.

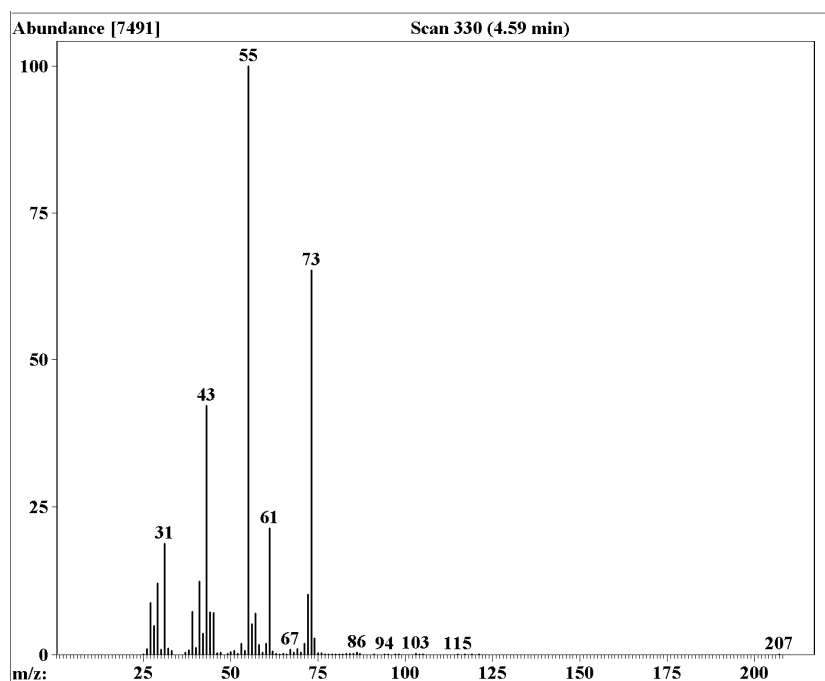

Figure S9. MS spectrum of 1,2-pentanediol.

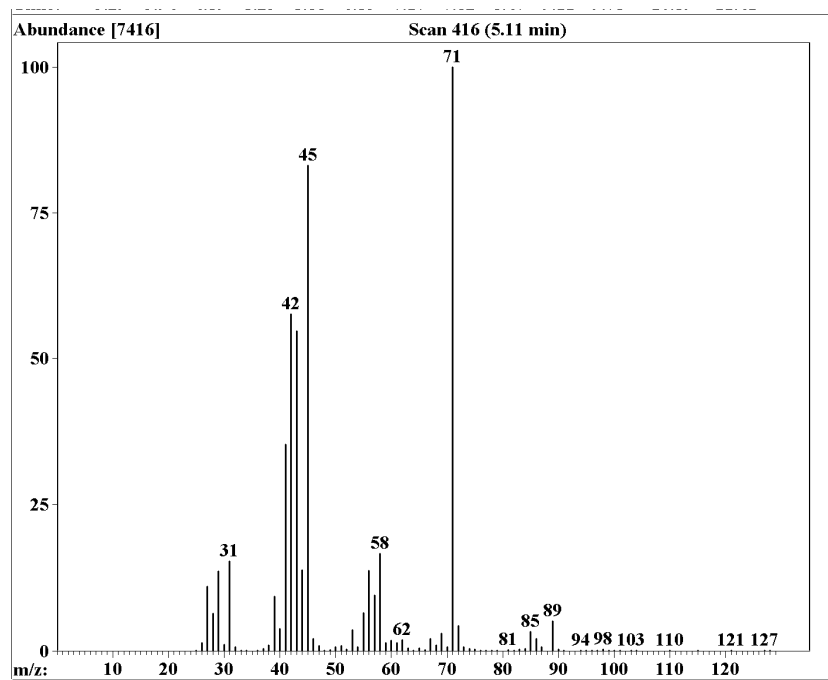

Figure S10. MS spectrum of 1,4- pentandiol.

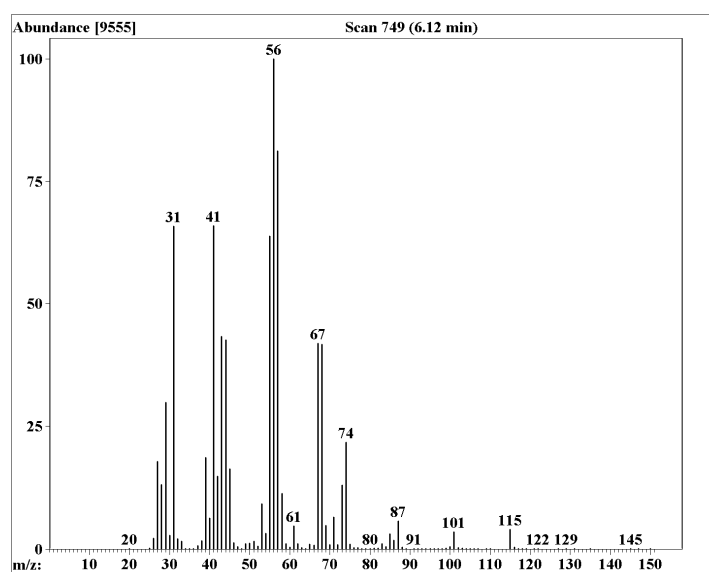

Figure S11. MS spectrum of 1,5- pentandiol.
